# Supplementary material for: Enhancement of birefringence and refractive index dispersion optimization from iodates to fluorooxoiodates
Source: Royal Society of Chemistry journal article supplement (doi:10.1039/d3nj01908j), 2023-01-01
Supplement: d3nj01908j1.pdf [file d3nj01908j1.pdf]

# Enhancement of birefringence and refractive index dispersion optimization from iodates to fluorooxiodates

Shibin Wang,<sup>a,#</sup> Jie Zhang,<sup>a,#</sup> Jianbang Chen<sup>a</sup>, Peng Han<sup>b</sup>, Na Lei<sup>b</sup> and Xuchu Huang<sup>a,\*</sup>

<sup>a</sup>College of Physics and Material Science, Changji University, Changji 831100, China.

<sup>b</sup>Xinjiang New Aluminum Industry Co., Ltd , 832000

<sup>#</sup>These authors contributed equally to this work.

\*Corresponding authors, E-mails: hxuchu@163.com

## Contents

Table S1. The main properties of  $\text{MIO}_3$  and  $\text{MIO}_2\text{F}_2$  ( $\text{M} = \text{Na}, \text{K}, \text{Rb}, \text{Cs}$ ), “Band gap-cal” shows the calculated band gap results for CASTEP, “Birefringence @1064 (nm)” shows the calculated refractive index results for CASTEP, and “Band gap-Exp/HSE06” shows the experimental band gap or the result calculated by the hybrid correlation functional HSE06.

Figure S1-S3. The structure of  $\text{MIO}_3$  ( $\text{M} = \text{K}, \text{Rb}, \text{Cs}$ ) and  $\text{MIO}_2\text{F}_2$  ( $\text{M} = \text{K}, \text{Rb}, \text{Cs}$ ).

Figure S4-S6. The TDOS and PDOS of  $\text{MIO}_3$  ( $\text{M} = \text{K}, \text{Rb}, \text{Cs}$ ) and  $\text{MIO}_2\text{F}_2$  ( $\text{M} = \text{K}, \text{Rb}, \text{Cs}$ ).

Figure S7. The angle between the lone pair electrons direction and the optical principal axis of  $\text{MIO}_3$  ( $\text{M} = \text{Na}, \text{K}, \text{Rb}, \text{Cs}$ ) and  $\text{MIO}_2\text{F}_2$  ( $\text{M} = \text{Na}, \text{K}, \text{Rb}, \text{Cs}$ ).

Figure S8-S9. The chromatic dispersion and of  $\text{MIO}_3$  ( $\text{M} = \text{Rb}, \text{Cs}$ ) and  $\text{MIO}_2\text{F}_2$  ( $\text{M} = \text{Rb}, \text{Cs}$ ).

Figure S10-S12. Structural arrangement of microscopic units of  $\text{MIO}_3$ ,  $\text{MIO}_2\text{F}_2$  ( $\text{M} = \text{K}, \text{Rb}, \text{Cs}$ ) in the direction of maximum and minimum refractive index.

Figure S13-S14. Refractive index dispersion of different NLO iodates, from  $\text{RbIO}_3$ ,  $\text{CsIO}_3$ ,  $\text{RbIO}_2\text{F}_2$  and  $\text{CsIO}_2\text{F}_2$ .

Table S1. The main properties of  $\text{MIO}_3$  and  $\text{MIO}_2\text{F}_2$  ( $\text{M} = \text{Na}, \text{K}, \text{Rb}, \text{Cs}$ ), “Band gap-cal” shows the calculated band gap results for CASTEP, “Birefringence @1064 (nm)” shows the calculated refractive index results for CASTEP, and “Band gap-Exp/HSE06” shows the experimental band gap or the result calculated by the hybrid correlation functional HSE06.

| Formula                     | $\text{NaIO}_3^1$       | $\text{NaIO}_2\text{F}_2^2$ | $\text{KIO}_3^3$        | $\text{KIO}_2\text{F}_2^4$ | $\text{RbIO}_3^5$       | $\text{RbIO}_2\text{F}_2^5$ | $\text{CsIO}_3^6$       | $\text{CsIO}_2\text{F}_2^6$ |
|-----------------------------|-------------------------|-----------------------------|-------------------------|----------------------------|-------------------------|-----------------------------|-------------------------|-----------------------------|
| Structure Type              | CS                      | CS                          | NCS                     | NCS                        | NCS                     | NCS                         | NCS                     | NCS                         |
| Space Group                 | <i>Pbmm</i> (62)        | <i>Cmcm</i> (63)            | <i>R3R</i> (146)        | <i>Pca21</i> (29)          | <i>R3mH</i> (160)       | <i>Pca21</i> (29)           | <i>R3mH</i> (160)       | <i>Pca21</i> (29)           |
| a(Å)                        | 5.7500(3)               | 6.9287(10)                  | 8.9481(8)               | 8.39430(4)                 | 6.413(2)                | 8.567(4)                    | 6.6051(10)              | 8.781(3)                    |
| b(Å)                        | 6.3953(3)               | 7.2735(13)                  | 8.9481(8)               | 5.97918(5)                 | 6.413(2)                | 6.151(3)                    | 6.6051(10)              | 6.3771(18)                  |
| c(Å)                        | 8.1280(4)               | 7.3503(13)                  | 8.9481(8)               | 8.44680(3)                 | 7.854(2)                | 8.652(4)                    | 8.087(3)                | 8.868(3)                    |
| $\alpha$ (deg)              | 90                      | 90                          | 89.950(10)              | 90                         | 90                      | 90                          | 90                      | 90                          |
| $\beta$ (deg)               | 90                      | 90                          | 89.950(10)              | 90                         | 90                      | 90                          | 90                      | 90                          |
| $\gamma$ (deg)              | 90                      | 90                          | 89.950(10)              | 90                         | 120                     | 90                          | 120                     | 90                          |
| V(Å <sup>3</sup> )          | 298.89[Å <sup>3</sup> ] | 370.42[Å <sup>3</sup> ]     | 716.46[Å <sup>3</sup> ] | 423.95[Å <sup>3</sup> ]    | 279.73[Å <sup>3</sup> ] | 455.92[Å <sup>3</sup> ]     | 305.54[Å <sup>3</sup> ] | 496.58[Å <sup>3</sup> ]     |
| Z                           | 4                       | 4                           | 8                       | 4                          | 3                       | 4                           | 3                       | 4                           |
| Band gap-Cal<br>(eV)        | 3.555                   | 4.331                       | 2.504                   | 4.39                       | 2.985                   | 4.393                       | 3.188                   | 4.325                       |
| Band gap-<br>HSE06 (eV)     | 5.128                   | 5.806                       | 4.303                   | 5.899                      | 4.394                   | 5.908                       | 4.574                   | 5.912                       |
| Birefringence<br>@1064 (nm) | 0.219                   | 0.249                       | 0.051                   | 0.024                      | 0.192                   | 0.022                       | 0.185                   | 0.016                       |
| Band gap-Exp<br>(eV)        | /                       | /                           | /                       | /                          | 4                       | 4.2                         | 4.2                     | 4.5                         |
| PM wavelength               | 263                     | 217                         | 506                     | 526                        | 275                     | 535                         | 266                     | 595                         |

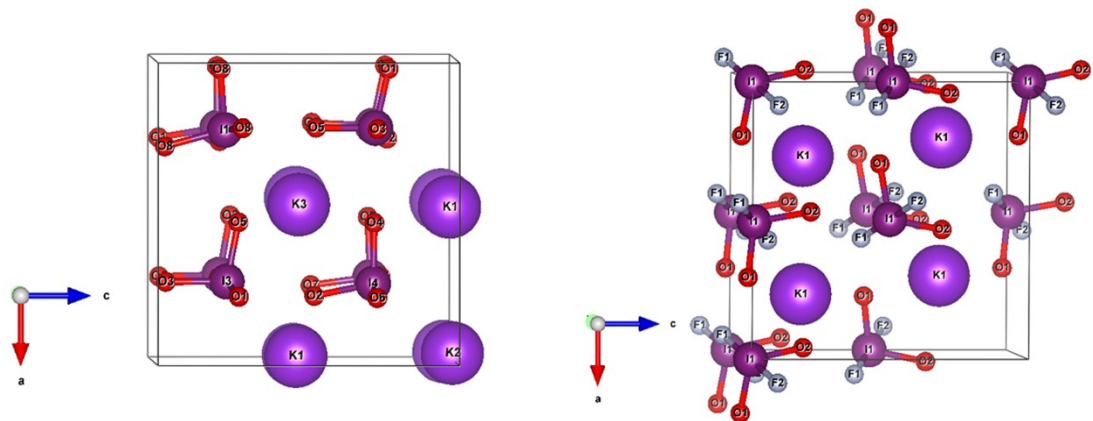

Figure S1. Structure diagram of  $\text{KIO}_3$  (left) and  $\text{KIO}_2\text{F}_2$  (right).

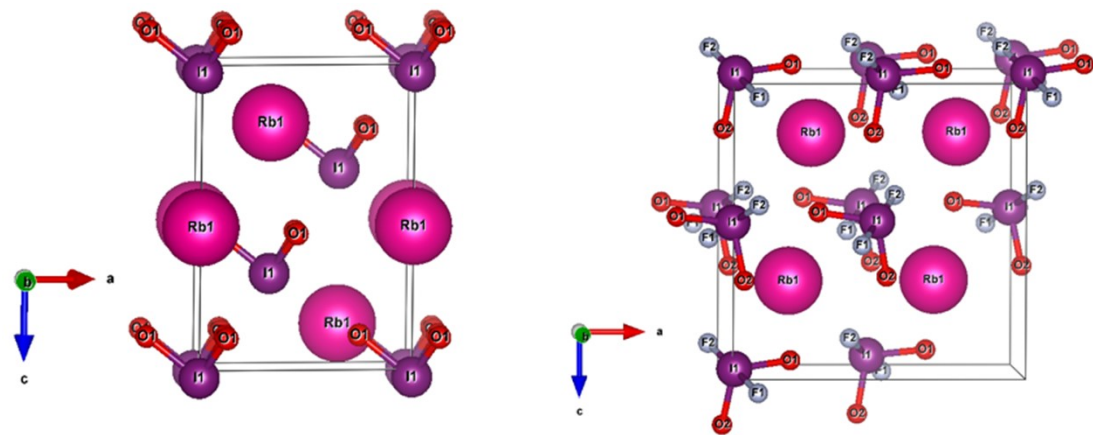

Figure S2. Structure diagram of  $\text{RbIO}_3$  (left) and  $\text{RbIO}_2\text{F}_2$  (right).

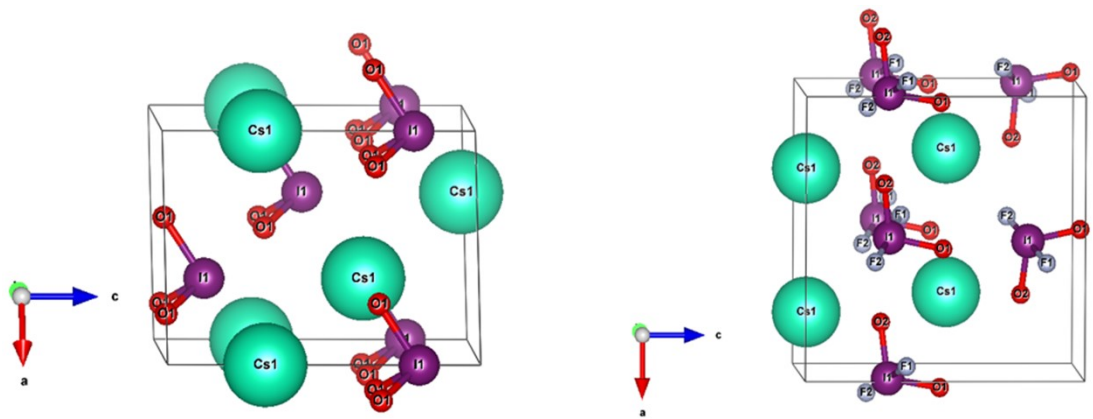

Figure S3. Structure diagram of  $\text{CsIO}_3$  (left) and  $\text{CsIO}_2\text{F}_2$  (right).

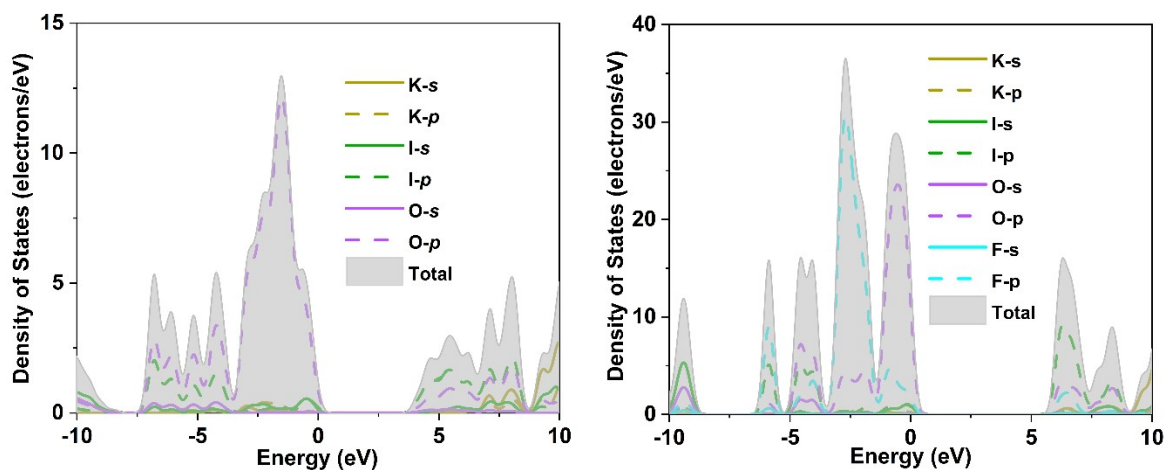

Figure S4. The PDOS of  $\text{KIO}_3$  (left) and  $\text{KIO}_2\text{F}_2$  (right).

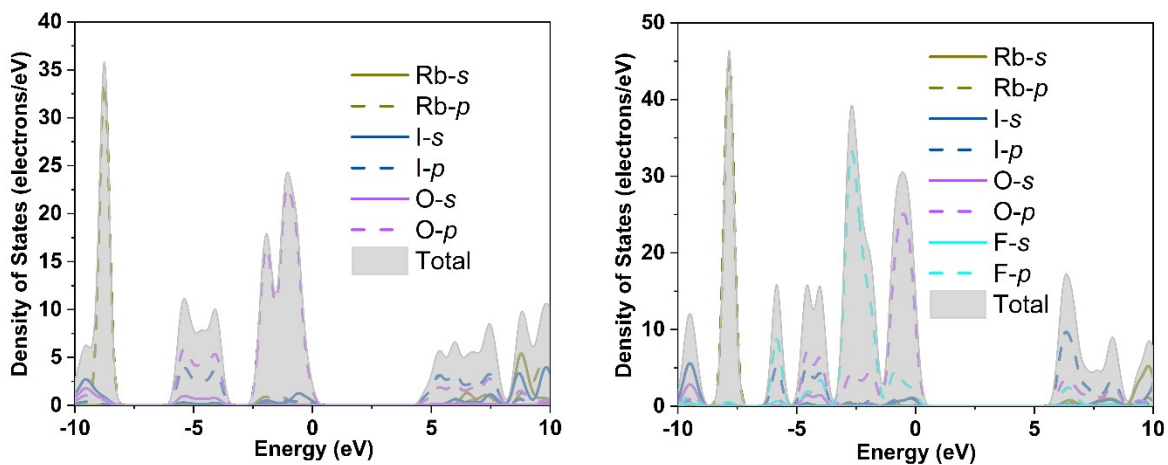

Figure S5. The PDOS of  $\text{RbIO}_3$  (left) and  $\text{RbIO}_2\text{F}_2$  (right).

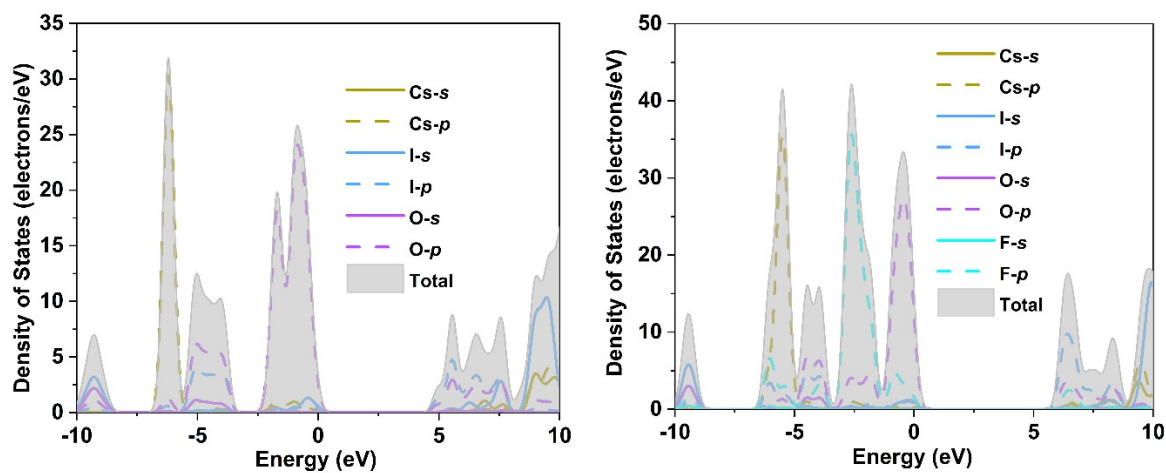

Figure S6. The PDOS of  $\text{CsIO}_3$  (left) and  $\text{CsIO}_2\text{F}_2$  (right).

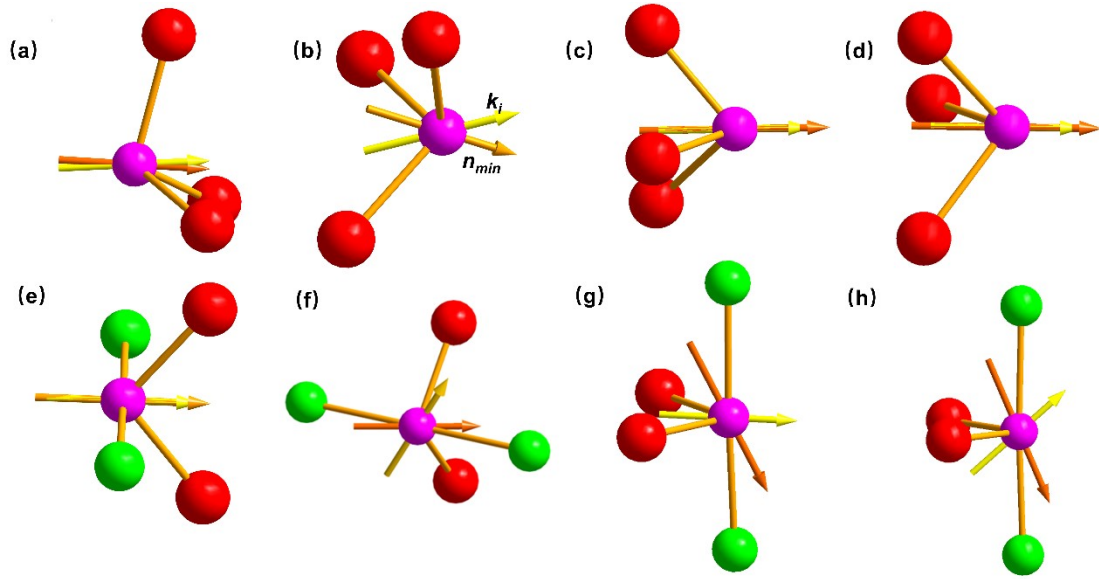

Figure S7. The angle between the lone pair electrons direction and the optical principal axis of  $\text{MIO}_3$  ( $M = \text{Na}, \text{K}, \text{Rb}, \text{Cs}$ ) and  $\text{MIO}_2\text{F}_2$  ( $M = \text{Na}, \text{K}, \text{Rb}, \text{Cs}$ ). a-h are  $\text{NaIO}_3$ ,  $\text{KIO}_3$ ,  $\text{RbIO}_3$ ,  $\text{CsIO}_3$ ,  $\text{NaIO}_2\text{F}_2$ ,  $\text{KIO}_2\text{F}_2$ ,  $\text{RbIO}_2\text{F}_2$ ,  $\text{CsIO}_2\text{F}_2$ , respectively. O (Red), I (Pink), F (Bright Green)

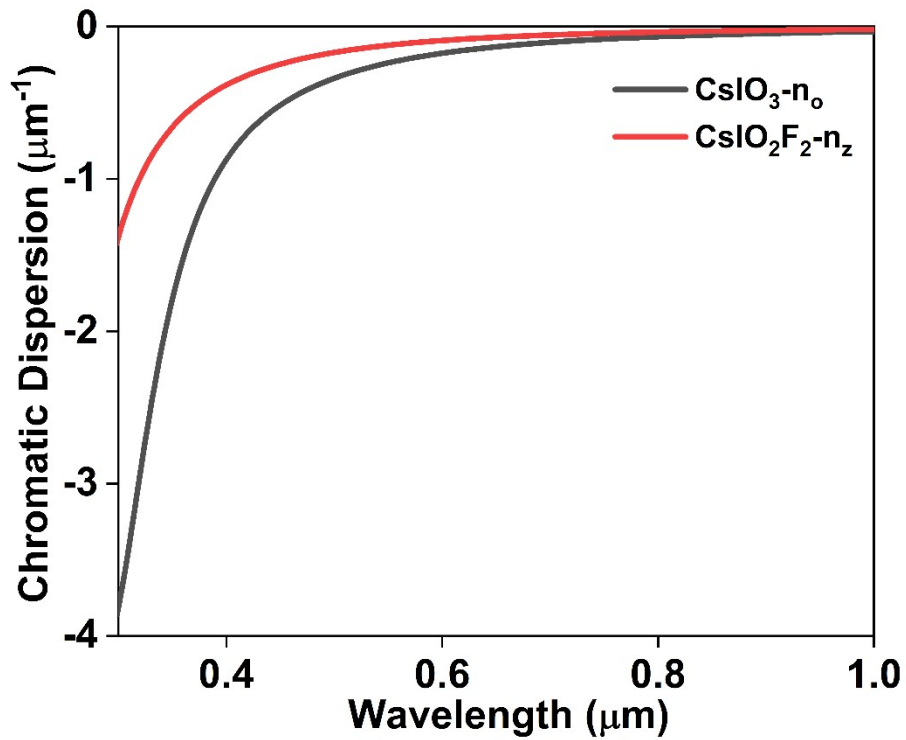

Figure S8. The Chromatic dispersion of  $\text{CsIO}_3$  and  $\text{CsIO}_2\text{F}_2$ .

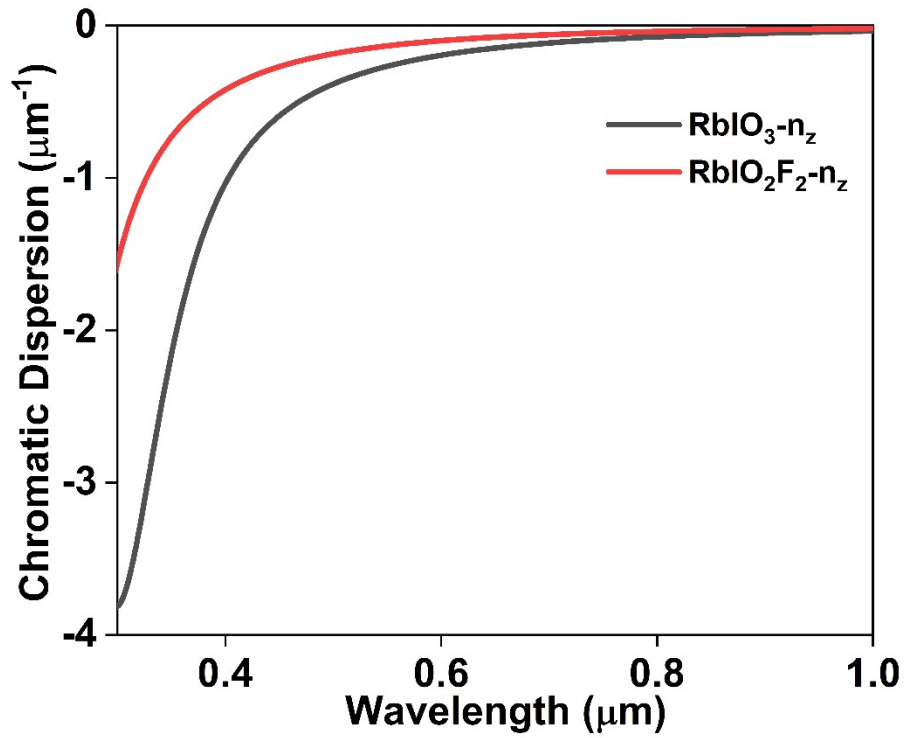

Figure S9. The Chromatic dispersion of  $\text{RbIO}_3$  and  $\text{RbIO}_2\text{F}_2$ .

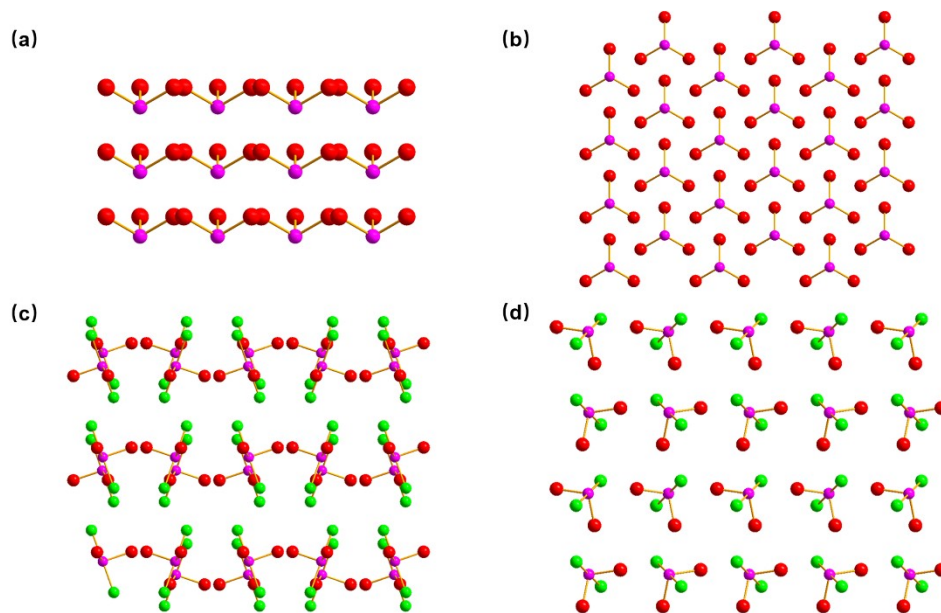

Figure S10. (a)  $\text{KIO}_3$  refractive index direction (210) structural alignment. (b) Structural alignment of  $\text{KIO}_3$  in the direction of refractive index (001). (c)  $\text{KIO}_2\text{F}_2$  refractive index direction (001) structural arrangement. (d) Structural alignment of  $\text{KIO}_2\text{F}_2$  in the direction of refractive index (010). O (Red) , I (Pink) ,F (Bright Green).

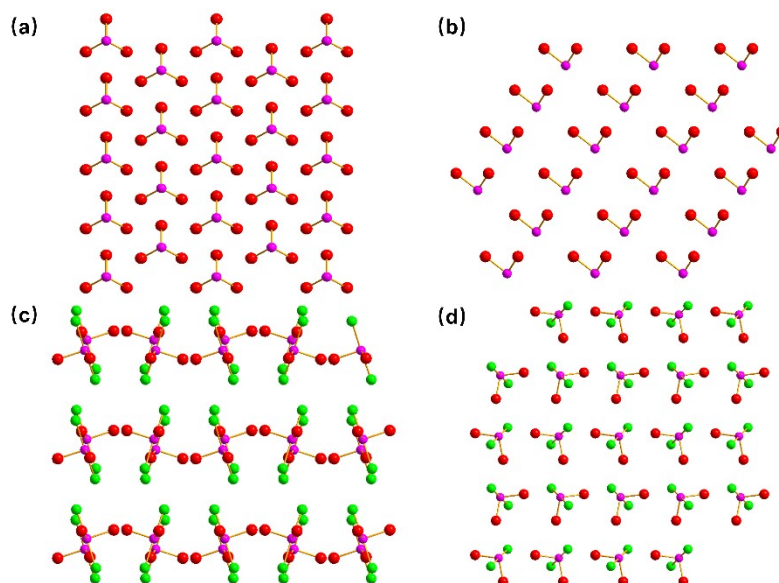

Figure S11. (a)  $\text{RbIO}_3$  refractive index direction (001) structural alignment. (b) Structural alignment of  $\text{RbIO}_3$  in the direction of refractive index (010). (c)  $\text{RbIO}_2\text{F}_2$  refractive index direction (001) structural arrangement. (d) Structural alignment of  $\text{RbIO}_2\text{F}_2$  in the direction of refractive index (010). O (Red), I (Pink), F (Bright Green).

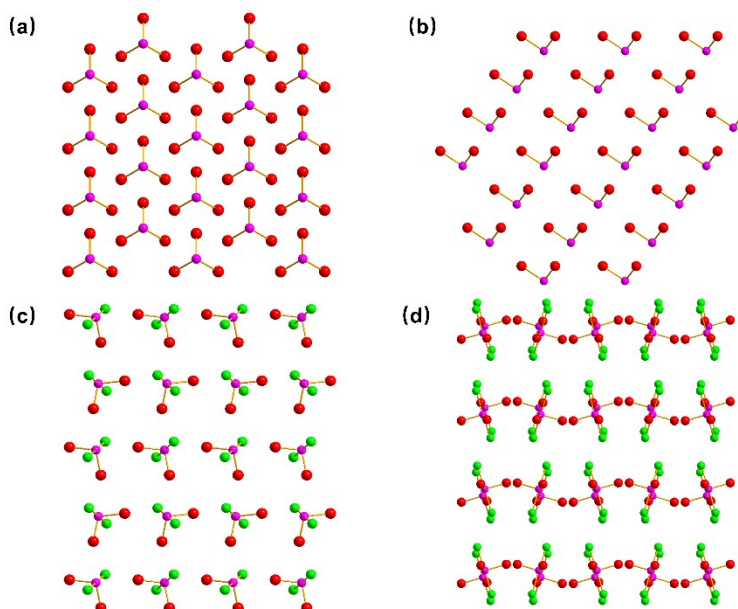

Figure S11. (a)  $\text{CsIO}_3$  refractive index direction (001) structural alignment. (b) Structural alignment of  $\text{CsIO}_3$  in the direction of refractive index (010). (c)  $\text{CsIO}_2\text{F}_2$  refractive index direction (010) structural arrangement. (d) Structural alignment of  $\text{CsIO}_2\text{F}_2$  in the direction of refractive index (001). O (Red), I (Pink), F (Bright Green).



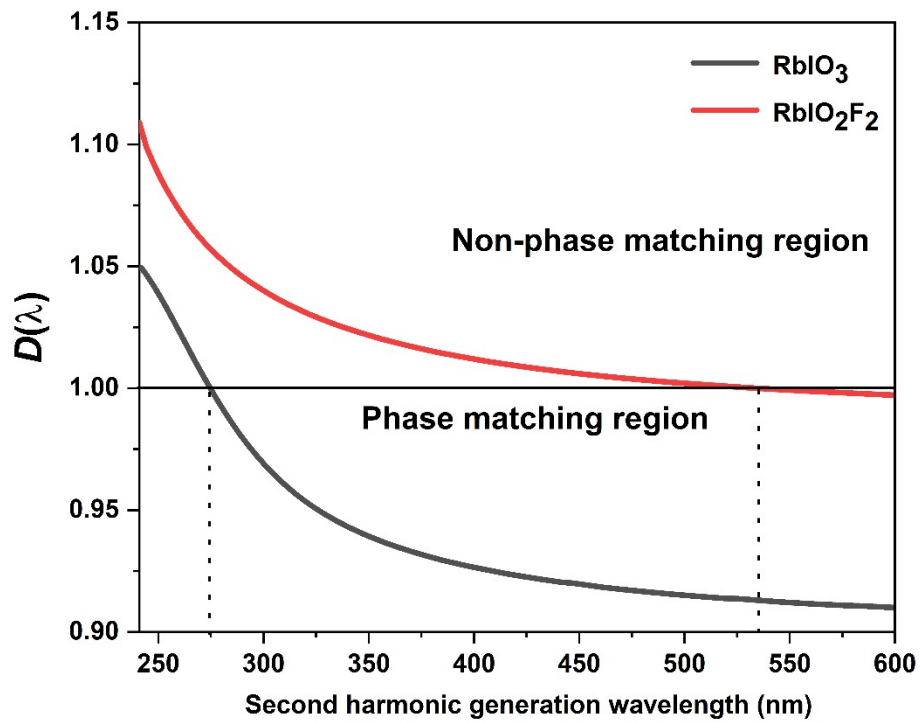

Figure S12. Refractive index dispersion of different NLO iodates, from  $\text{RbIO}_3$  and  $\text{RbIO}_2\text{F}_2$ .

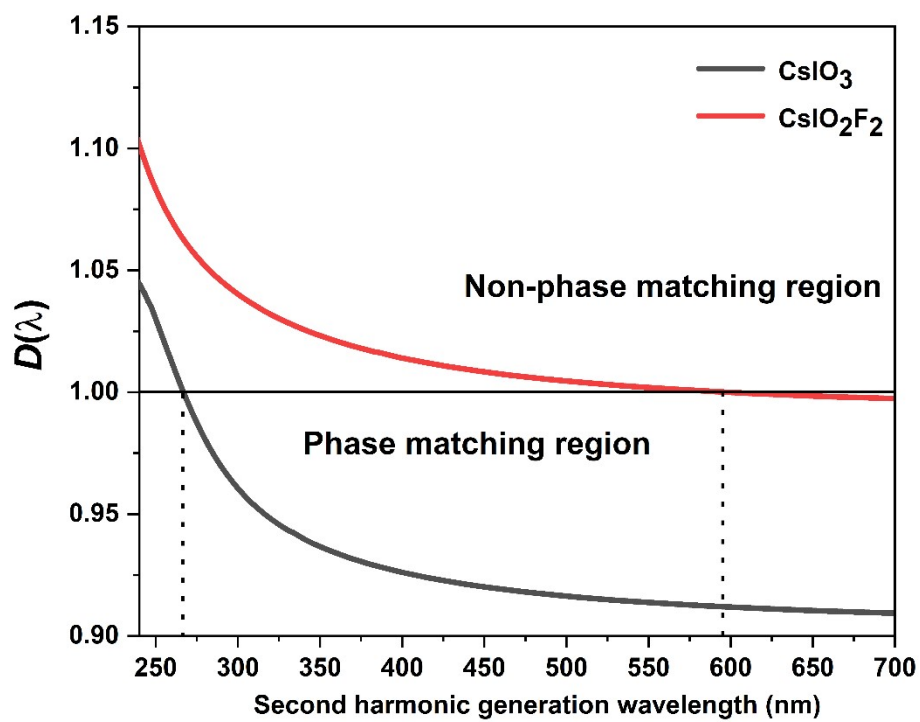



Figure S13. Refractive index dispersion of different NLO iodates, from CsIO<sub>3</sub> and CsIO<sub>2</sub>F<sub>2</sub>.

## References

1. C. Svensson and K. Ståhl, The crystal structure of NaIO<sub>3</sub> at 293 K, *J. Solid. State. Chem.*, 1988, **77**, 112-116.
2. J.-P. Laval and N. Jennene Boukharrata, Sodium iodine (V) oxyfluoride, NaIO<sub>2</sub>F<sub>2</sub>, *Acta Crystallogr. C.*, 2008, **64**, 147-149.
3. E. L. Belokoneva, S. Y. Stefanovich and O. V. Dimitrova, New nonlinear optical potassium iodate K[IO<sub>3</sub>] and borates K<sub>3</sub>[B<sub>6</sub>O<sub>10</sub>]Br, KTa[B<sub>4</sub>O<sub>6</sub>(OH)<sub>4</sub>](OH)<sub>2</sub>· 1.33 H<sub>2</sub>O—Synthesis, structures and relation to the properties, *J. Solid. State. Chem.*, 2012, **195**, 79-85.
4. S. Abrahams and J. Bernstein, Ferroelastic KIO<sub>2</sub>F<sub>2</sub>: Crystal structure and ferroelastic transformation, *J Chem. Phys.*, 1976, **64**, 3254-3260.
5. Q. Wu, H. Liu, F. Jiang, L. Kang, L. Yang, Z. Lin, Z. Hu, X. Chen, X. Meng and J. Qin, RbIO<sub>3</sub> and RbIO<sub>2</sub>F<sub>2</sub>: Two promising nonlinear optical materials in mid-IR region and influence of partially replacing oxygen with fluorine for improving laser damage threshold, *Chem. Mater.*, 2016, **28**, 1413-1418.
6. M. Zhang, C. Hu, T. Abudouwufu, Z. Yang and S. Pan, Functional materials design via structural regulation originated from ions introduction: A study case in cesium iodate system, *Chem. Mater.*, 2018, **30**, 1136-1145.
